# Supplementary material for: Thermally Conductive Film Fabricated Using Perforated Graphite Sheet and UV-Curable Pressure-Sensitive Adhesive
Source: MDPI journal article supplement (doi:10.3390/nano11010093), 2021-01-03
Supplement: s1 [file s1]

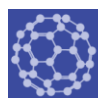

## Supplementary Materials

# Thermally Conductive Film Fabricated Using Perforated Graphite Sheet and UV-Curable Pressure-Sensitive Adhesive

Hee-Jin Lee, Gayoung Lim, Eunseong Yang, Young-Seok Kim, Min-Gi Kwak and Youngmin Kim \*

Display Research Center, Korea Electronics Technology Institute, 25 Saenariro, Bundang-gu, Seongnam 13509, Korea; gmlwls5010@gmail.com (H.-J.L.); addzero@kakao.com (G.L.); didguswd567@naver.com (E.Y.); vis4freedom@keti.re.kr (Y.-S.K.); kwakmg@keti.re.kr (M.-G.K.)

\* Correspondence: ymkim@keti.re.kr

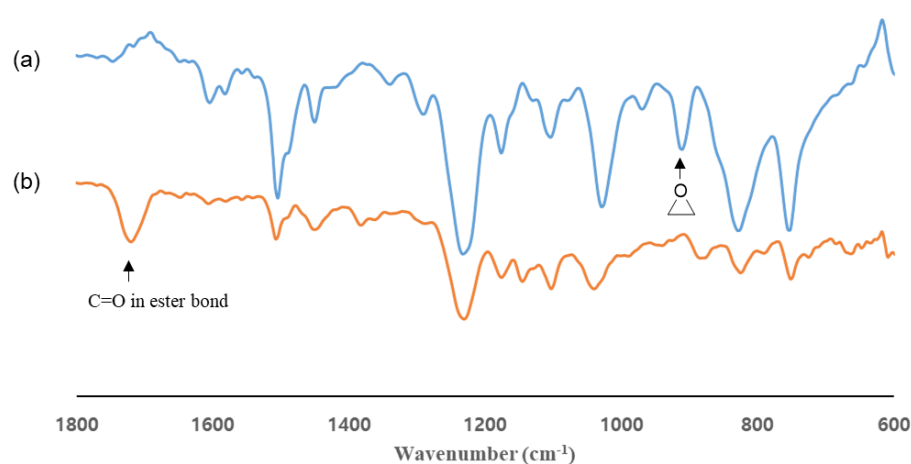

**Figure S1.** FTIR spectra of (a) tris(4-hydroxyphenyl)methane triglycidyl ether and (b) AAE-2.

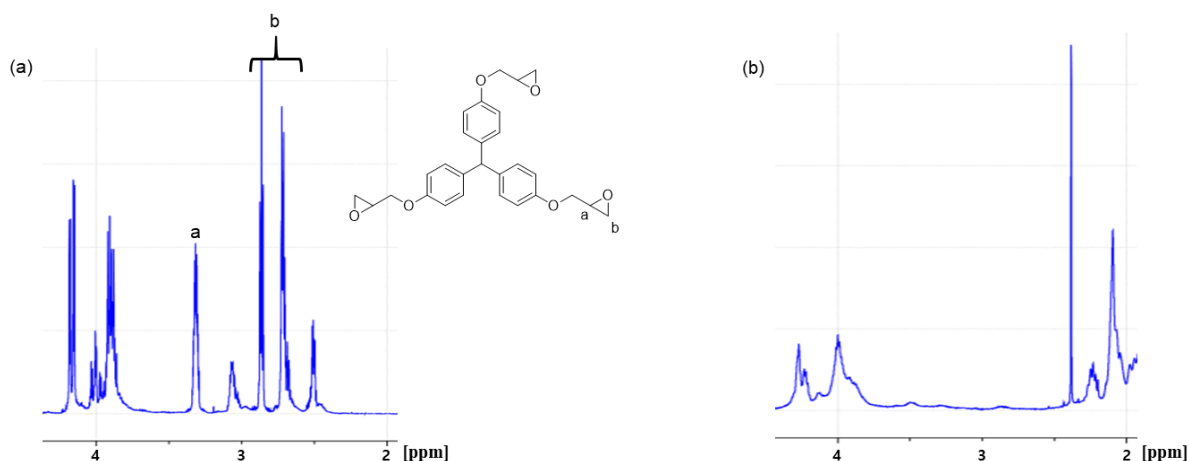

**Figure S2.**  $^1\text{H}$ -NMR spectra of (a) tris(4-hydroxyphenyl)methane triglycidyl ether and (b) AAE-2. The proton resonances for epoxide ring were disappeared through a ring-opening reaction.

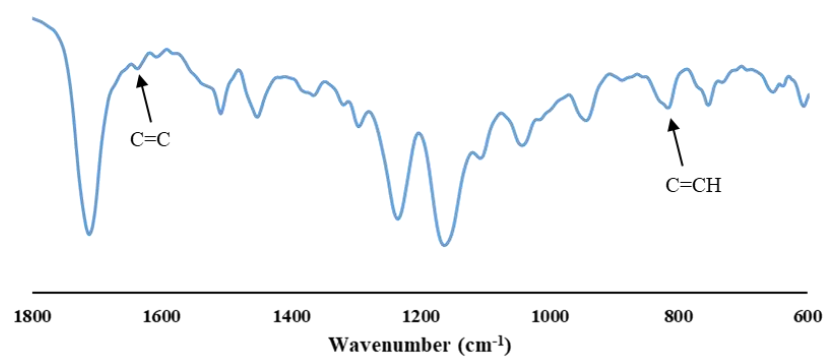

**Figure S3.** FTIR spectra of TM-3.

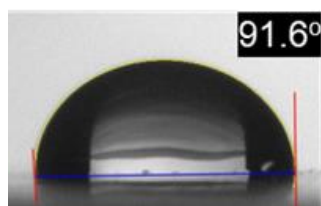

**Figure S4.** A photography image of contact angle of a water drop on the graphite sheet.

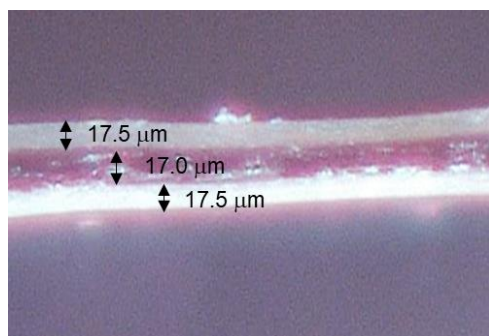

**Figure S5.** A cross sectional microscopic image of the g-TC film.

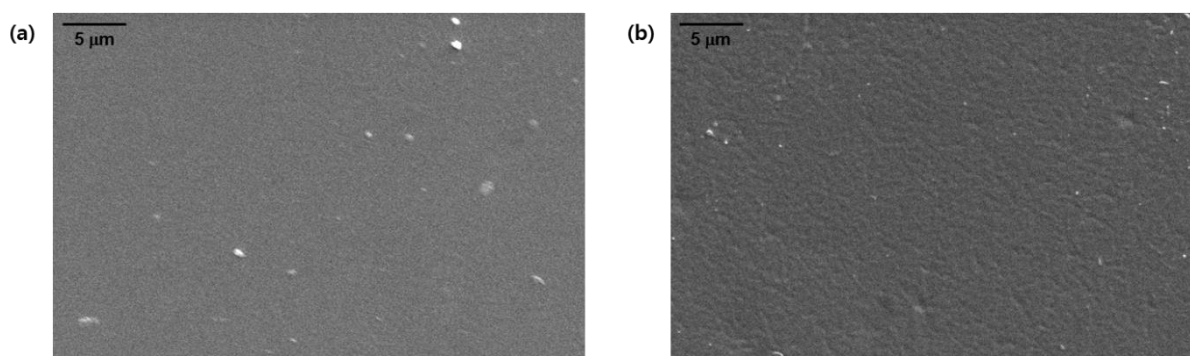

**Figure S6.** SEM images of surfaces of the g-TC films (a) before and (b) after U-folding tests.
